# Supplementary material
Source: PubMed Central journal article supplement (PMC4715780)
Supplement: NIHMS712878-supplement-Supp_MaterialS1.pdf [file NIHMS712878-supplement-Supp_MaterialS1.pdf]

# Supporting information for “Improving the efficiency of estimation in the additive hazards model for stratified case-cohort design with multiple diseases” by Soyoung Kim, Jianwen Cai, and David Couper

May 23, 2015

## 1 Proofs of Theorems

We will outline the proofs for the main theorems. We make the following assumptions:

- (a)  $\{T_{li}, C_{li}, Z_{li}\}$ ,  $i = 1, \dots, n$  and  $l = 1, \dots, L$  are independent and identically distributed where  $T_{li} = (T_{li1}, \dots, T_{liK})^T$ ,  $C_{li} = (C_{li1}, \dots, C_{liK})^T$ , and  $Z_{li} = (Z_{li1}, \dots, Z_{liK})^T$ ;
- (b)  $\mathbf{P}\{Y_{lik}(t) = 1\} > 0$  for  $t \in [0, \tau]$ ,  $i = 1, \dots, n_l$ ,  $k = 1, 2$ , and  $l = 1, \dots, L$ ;
- (c)  $|Z_{lik}(0)| + \int_0^\tau |dZ_{lik}(t)| < D_z < \infty$ ,  $i = 1, \dots, n_l$ ,  $k = 1, 2$ , and  $l = 1, \dots, L$  almost surely and  $D_z$  is a constant;
- (d) The matrix  $A_k$  is positive definite for  $k = 1, 2$  where  $A_k = \sum_{l=1}^L q_l E_l(\int_0^\tau Y_{l1k}(t)\{Z_{l1k}(t)\}^{\otimes 2} - [E\{Y_{l1k}(t)Z_{l1k}(t)\}/E\{Y_{l1k}(t)\}]^{\otimes 2})dt$  where  $q_l = \lim_{n \rightarrow \infty} n_l/n$ ;
- (e) For all  $k = 1, 2$ ,  $\int_0^\tau \lambda_{0k}(t)dt < \infty$ ;

To show the desired asymptotic properties for generalized case-cohort samples, the following conditions are also needed:

- (f) For all  $l = 1, \dots, L$ ,  $\lim_{n \rightarrow \infty} \tilde{\alpha}_l = \alpha_l$ , where  $\tilde{\alpha}_l = \tilde{n}_l/n_l$  and  $\alpha_l$  is a positive constant.
- (g)  $\lim_{n \rightarrow \infty} n_{lk}/n_l = p_{lk}$ , where  $p_{lk}$  is a positive constant on  $[0,1]$  for all  $k = 1, 2$  and  $l = 1, \dots, L$ .
- (h)  $\lim_{n \rightarrow \infty} n_l/n = q_l$ , where  $q_l$  is a positive constant on  $[0,1]$  for all  $l = 1, \dots, L$ .

The following lemmas are used in order to prove the theorems. The proof of Lemma 1.1 is in Lin [1] and Lemma 1.2 is in Lemma A1 in Kang and Cai [2].

**Lemma 1.1** Let  $\mathcal{H}_n(t)$  and  $\mathcal{W}_n(t)$  be two sequences of bounded process. If we assume that the following conditions: (1)  $\sup_{0 \leq t \leq \tau} \|\mathcal{H}_n(t) - \mathcal{H}(t)\| \rightarrow_p 0$  for some bounded process  $\mathcal{H}(t)$ , (2)  $\mathcal{H}_n(t)$  is monotone on  $[0, \tau]$  and (3)  $\mathcal{W}_n(t)$  converges to zero-mean process with continuous sample paths, hold for some constant  $\tau$ , then

$$\sup_{0 \leq t \leq \tau} \left\| \int_0^t \{\mathcal{H}_n(s) - \mathcal{H}(s)\} d\mathcal{W}_n(s) \right\| \rightarrow_p 0, \sup_{0 \leq t \leq \tau} \left\| \int_0^t \mathcal{W}_n(s) d\{\mathcal{H}_n(s) - \mathcal{H}(s)\} \right\| \rightarrow_p 0$$

**Lemma 1.2** Let  $B_i(t)$ ,  $i = 1, \dots, n$  be independent and identically distributed real-valued random process on  $[0, \tau]$  and denote random process vector,  $\mathbf{B}(t) = [B_1(t), \dots, B_n(t)]$  with  $EB_i(t) \equiv \mu_B(t)$ ,  $\text{var } B_i(0) < \infty$ , and  $\text{var } B_i(\tau) < \infty$ . Let  $\xi = [\xi_1, \dots, \xi_n]$  be random vector containing  $\tilde{n}$  ones and  $n - \tilde{n}$  zeros with each permutation equally likely. Let  $\xi$  be independent of  $\mathbf{B}(t)$ . Suppose that almost all paths of  $B_i(t)$  have finite variation. Then  $n^{-1/2} \sum_{i=1}^n \xi_i \{B_i(t) - \mu_B(t)\}$  converges weakly in  $l^\infty[0, \tau]$  to a zero-mean Gaussian process, and  $n^{-1} \sum_{i=1}^n \xi_i \{B_i(t) - \mu_B(t)\}$  converges in probability to zero uniformly in  $t$ .

### The proof of Theorem 1

We first show the consistency of  $\tilde{\beta}$ . Denote  $\tilde{U}_n = n^{-1}\tilde{U}$ . Based on the extension of Fourtz [3], if the following conditions are satisfied (i)  $\frac{\partial \tilde{U}_n(\beta)}{\partial \beta^T}$  exists and is continuous in an open neighborhood  $\mathcal{B}$  of  $\beta_0$ , (ii)  $\frac{\partial \tilde{U}_n(\beta)}{\partial \beta^T}$  is negative definite with probability going to one as  $n \rightarrow \infty$ , (iii)  $-\frac{\partial \tilde{U}_n(\beta)}{\partial \beta^T}$  converges to  $A(\beta_0)$  in probability uniformly for  $\beta$  in an open neighborhood about  $\beta_0$ , (iv)  $\tilde{U}_n(\beta)$  converges to 0 in probability, then, we can show that  $\tilde{\beta}$  converges to  $\beta_0$  in probability. Note that  $-\frac{\partial \tilde{U}_n(\beta)}{\partial \beta^T} = \frac{1}{n} \sum_{l=1}^L \sum_{i=1}^{n_l} \sum_{k=1}^2 \int_0^\tau \pi_{lik}(t) Y_{lik}(t) \{Z_{lik}(t)^{\otimes 2} - \tilde{Z}_k(t)^{\otimes 2}\} dt$

Definitely, condition (i) is satisfied. Conditions (ii) and (iii) also are satisfied due to uniform convergence of  $\tilde{Z}_k(t)$  to  $e_k(t)$  for  $k = 1, 2$ , uniform convergence of  $\tilde{\alpha}_{lk}(t)^{-1} - \tilde{\alpha}_l^{-1}$ ,  $\tilde{\gamma}_{l1k}(t)^{-1} - \tilde{\gamma}_{l1k}$ , and  $\tilde{\gamma}_{l2k}(t)^{-1} - \tilde{\gamma}_{l2k}$  to zero, condition (c), and Lemma 1.2.  $n^{1/2}\tilde{U}_n(\beta)$  can be decomposed into four parts:

$$\begin{aligned} n^{1/2}\tilde{U}_n(\beta) &= n^{-1/2} \sum_{l=1}^L \sum_{i=1}^{n_l} \sum_{k=1}^2 \int_0^\tau \{Z_{lik}(t) - e_k(t)\} dM_{lik}(t) \\ &+ n^{-1/2} \sum_{l=1}^L \sum_{i=1}^{n_l} \sum_{k=1}^2 \int_0^\tau \{\pi_{lik}(t) - 1\} \{Z_{lik}(t) - e_k(t)\} dM_{lik}(t) \\ &+ n^{-1/2} \sum_{l=1}^L \sum_{i=1}^{n_l} \sum_{k=1}^2 \int_0^\tau \{e_k(t) - \tilde{Z}_k(t)\} dM_{lik}(t) \\ &+ n^{-1/2} \sum_{l=1}^L \sum_{i=1}^{n_l} \sum_{k=1}^2 \int_0^\tau \{\pi_{lik}(t) - 1\} \{e_k(t) - \tilde{Z}_k(t)\} dM_{lik}(t) \end{aligned} \quad (1)$$

Since the first term on the right-hand side of (1) is the pseudo partial likelihood score function for the full likelihood, it is asymptotically zero-mean normal with covariance  $V_{II}^a(\beta_0) = n^{-1/2} \sum_{l=1}^L q_l E_l[\sum_{k=1}^2 Q_{l1k}(\beta_0)]^{\otimes 2}$  where  $Q_{lik}(t, \beta) = \int_0^t \{Z_{lik}(t) - e_k(t)\} dM_{lik}(t)$  Yin and Cai[4].

The third term can be written as  $\sum_{l=1}^L n_l^{1/2} n^{-1/2} \sum_{k=1}^2 \int_0^\tau \{e_k(t) - \tilde{Z}_k(t)\} \{n_l^{-1/2} \sum_{i=1}^{n_l} dM_{lik}(t)\}$  and  $M_{l1k}(t), \dots, M_{lnk}(t)$  is identically and independently distributed zero-mean random variable for fixed  $t$ . Since  $M_{lik}^2(0) < \infty$  and  $M_{lik}^2(\tau) < \infty$  are satisfied based on conditions (c)

and (e),  $M_{lik}(t)$  is of bounded variation and therefore it can be written as a difference of two monotone functions in  $t$ . From the example of 2.11.16 of van der Vaart and Wellner [5](p215),  $n_l^{-1/2} \sum_{i=1}^{n_l} M_{lik}(t)$  converges weakly to a zero-mean Gaussian process, say  $\mathcal{P}_{M,lik}(t)$ .

Since  $\tilde{Z}_k(t)$  is of bounded variation and can be written as sum of two monotone functions in  $t$ , the third and fourth terms on the right-hand side of (1) converge to zero in probability uniformly in  $t$  as  $n \rightarrow \infty$  by Lemma 1.1 and boundness of  $\pi_{lik}(t) - 1$ .

By using the asymptotic property of  $n_l^{1/2} \{\tilde{\alpha}_{lk}^{-1}(t) - \tilde{\alpha}_l^{-1}\}$ ,  $n_l^{1/2} \{\tilde{\gamma}_{lmk}^{-1}(t) - \tilde{\gamma}_{lmk}^{-1}\}$  ( $m = 1, 2, 3, 4$ ), Glivenko-Cantelli lemma and Lemma 1.2, the second term on the right-hand side of (1) is asymptotically equivalent to

$$\begin{aligned}
& n^{-1/2} \sum_{l=1}^L \sum_{i=1}^{n_l} \sum_{k=1}^2 \prod_{j=1}^2 (1 - \Delta_{lij}) \left( \frac{\xi_{li}}{\tilde{\alpha}_l} - 1 \right) \int_0^\tau \left[ B_{lik}(\beta_0, t) - Y_{lik}(t) \frac{E_l \{ \prod_{j=1}^2 (1 - \Delta_{lij}) B_{1k}(\beta_0, t) \}}{E_l \{ \prod_{j=1}^2 (1 - \Delta_{lij}) Y_{l1k}(t) \}} \right] dt \\
& + n^{-1/2} \sum_{l=1}^L \sum_{i=1}^{n_l} \sum_{k=1}^2 \Delta_{li1} (1 - \Delta_{li2}) \left( \frac{\eta_{li1}}{\tilde{\gamma}_{l1k}} - 1 \right) \left[ Q_{lik}(\beta) - \int_0^\tau Y_{lik}(t) \frac{E_l \{ dQ_{lik}(t, \beta) | \theta_{l10}, \xi_{l1} = 0 \}}{E_l \{ Y_{l1k}(t) | \theta_{l10} \}} \right] \\
& + n^{-1/2} \sum_{l=1}^L \sum_{i=1}^{n_l} \sum_{k=1}^2 (1 - \Delta_{li1}) \Delta_{li2} \left( \frac{\eta_{li2}}{\tilde{\gamma}_{l2k}} - 1 \right) \left[ Q_{lik}(\beta) - \int_0^\tau Y_{lik}(t) \frac{E_l \{ dQ_{lik}(t, \beta) | \theta_{l01}, \xi_{l1} = 0 \}}{E_l \{ Y_{l1k}(t) | \theta_{l01} \}} \right] \\
& + n^{-1/2} \sum_{l=1}^L \sum_{i=1}^{n_l} \sum_{k=1}^2 \Delta_{li1} \Delta_{li2} \left( \frac{\eta_{li1} + \eta_{li2} - \eta_{li1} \eta_{li2}}{\tilde{\gamma}_{l1k} + \tilde{\gamma}_{l2k} - \tilde{\gamma}_{l1k} \tilde{\gamma}_{l2k}} - 1 \right) \\
& \times \left[ Q_{lik}(\beta) - \int_0^\tau Y_{lik}(t) \frac{E_l \{ dQ_{lik}(t, \beta) | \theta_{l11}, \xi_{l1} = 0 \}}{E_l \{ Y_{l1k}(t) | \theta_{l11} \}} \right] \tag{2}
\end{aligned}$$

where  $B_{lik}(t, \beta) = \{Z_{lik}(t) - e_k(t)\} Y_{lik}(t) \{ \lambda_{0k}(t) + \beta_0^T Z_{lik}(t) \}$ .

By Hájek [6]'s central limit theorem and conditions (c) and (f), the first term in (2) is asymptotically zero-mean normal random variable with covariance matrix  $\sum_{l=1}^L q_l \frac{1-\alpha_l}{\alpha_l} V_{II,l}^a(\beta_0)$  where  $V_{II,l}^a(\beta_0)$  is defined in Theorem 1.

It follows from Lemma 1.2 and Hájek [6]'s central limit theorem that the second, third, fourth, and fifth terms are asymptotically zero-mean normal with covariance matrix  $\sum_{l=1}^L q_l (1-\alpha_l) \sum_{k=1}^2 V_{III,lk}^a(\beta_0)$  where  $V_{III,lk}^a(\beta_0)$  is defined in Theorem 1.

Since all five terms in (2) are mutually independent from conditional expectation arguments,  $n^{1/2} \tilde{U}_n(\beta)$  is asymptotically normally distributed with mean zero and variance  $\Sigma$ . Therefore,  $\tilde{U}_n(\beta)$  converges to zero in probability and condition (iv) is satisfied.

Since all conditions (i), (ii), (iii) and (iv) by an extension of Fourtz [3] are satisfied,  $\tilde{\beta}$  is a consistent estimator of  $\beta_0$ . By consistency of  $\tilde{\beta}$  and Taylor expansion of  $\tilde{U}(\beta)$ ,  $n^{1/2}(\tilde{\beta} - \beta_0)$  is asymptotically normally distributed with mean zero and with variance matrix  $A^{-1} \Sigma(\beta_0) A^{-1}$  where  $A = \sum_{k=1}^2 A_k$ .

### The proof of Theorem 2

$n^{1/2} \{ \tilde{\Lambda}_{0k}(\tilde{\beta}, t) - \Lambda_{0k}(t) \}$  can be decomposed into three parts:

$$n^{1/2} \left\{ \int_0^t \frac{\sum_{l=1}^L \sum_{i=1}^{n_l} \pi_{lik}(u) (\beta_0 - \tilde{\beta})^T Z_{lik}(u) du}{\sum_{l=1}^L \sum_{i=1}^{n_l} \pi_{lik}(u) Y_{lik}(u)} + \int_0^t \frac{\sum_{l=1}^L \sum_{i=1}^{n_l} dM_{lik}(u)}{\sum_{l=1}^L \sum_{i=1}^{n_l} \pi_{lik}(u) Y_{lik}(u)} \right\}$$

$$+ \int_0^t \frac{\sum_{l=1}^L \sum_{i=1}^{n_l} (\pi_{lik}(u) - 1) dM_{lik}(u)}{\sum_{l=1}^L \sum_{i=1}^{n_l} \pi_{lik}(u) Y_{lik}(u)}. \quad (3)$$

Due to the uniform convergence of  $\tilde{Z}_k(t)$  to  $e_k(t)$ , the first term in (3) is asymptotically equivalent to  $n^{1/2}(\tilde{\beta} - \beta_0)l_k(t)$  where  $l_k(t) = \int_0^t \{-e_k(u)\} du$ .

The term  $\{n^{-1} \sum_{l=1}^L \sum_{i=1}^{n_l} \pi_{lik}(t) Y_{lik}(t)\}^{-1}$  can be written as the sum of two monotone functions in  $u$  and converges to  $[\sum_{l=1}^L q_l E_l \{Y_{l1k}(t)\}]^{-1}$  where  $\sum_{l=1}^L q_l E_l \{Y_{l1k}(u)\}$  is bounded away from zero and  $n^{-1/2} \sum_{l=1}^L \sum_{i=1}^{n_l} M_{lik}(u)$  converges to a zero-mean Gaussian process with continuous sample paths. Therefore, it follows from Lemma 1.1 that the second term in (3) is asymptotically equivalent to  $\int_0^t \frac{1}{\sum_{l=1}^L q_l E_l \{Y_{l1k}(t)\}} d\{n^{1/2} \sum_{l=1}^L \sum_{i=1}^{n_l} M_{lik}(u)\}$ .

Since  $\{n^{-1} \sum_{l=1}^L \sum_{i=1}^{n_l} \pi_{lik}(t) Y_{lik}(t)\}^{-1}$  converges to  $\sum_{l=1}^L q_l E_l \{Y_{l1k}(u)\}^{-1}$ , where  $\sum_{l=1}^L q_l E_l \{Y_{l1k}(u)\}$  is bounded away from zero in probability uniformly and  $n^{-1} \sum_{l=1}^L \sum_{i=1}^{n_l} \frac{\xi_{li}}{\tilde{\alpha}_l} \times \prod_{j=1}^2 (1 - \Delta_{lij}) Y_{lik}(u)$  converges to  $\sum_{l=1}^L q_l E_l \{\prod_{j=1}^2 (1 - \Delta_{lij}) Y_{l1k}(u) \beta_0^T Z_{lik}(u)\}$  from Lemma 1.2, the third term in (3) is asymptotically equivalent to

$$\begin{aligned} & n^{-1/2} \sum_{l=1}^L \sum_{i=1}^{n_l} (1 - \frac{\xi_{li}}{\tilde{\alpha}_l}) \prod_{j=1}^2 (1 - \Delta_{lij}) \int_0^t Y_{lik}(u) \\ & \times \left[ \beta_0^T Z_{lik}(u) - \frac{E_l \{\prod_{j=1}^2 (1 - \Delta_{lij}) Y_{l1k}(u) \beta_0^T Z_{lik}(u)\}}{E_l \{\prod_{j=1}^2 (1 - \Delta_{lij}) Y_{l1k}(u)\}} \right] \frac{du}{\sum_{l=1}^L q_l E_l \{Y_{l1k}(u)\}} \\ & + n^{-1/2} \sum_{l=1}^L \sum_{i=1}^{n_l} (1 - \xi_{li}) [ \\ & + (\frac{\eta_{li1}}{\tilde{\gamma}_{l1k}} - 1) \Delta_{li1} (1 - \Delta_{li2}) \int_0^t \frac{1}{\sum_{l=1}^L q_l E_l \{Y_{l1k}(t)\}} \left[ dM_{lik}(u) - Y_{lik}(u) \frac{E_l \{dM_{l1k}(\beta_0, u) | \theta_{l10}, \xi_{li} = 0\}}{E_l \{Y_{l1k}(u) | \theta_{l10}\}} \right] \\ & + (\frac{\eta_{li2}}{\tilde{\gamma}_{l2k}} - 1) (1 - \Delta_{li1}) \Delta_{li2} \int_0^t \frac{1}{\sum_{l=1}^L q_l E_l \{Y_{l1k}(t)\}} \left[ dM_{lik}(u) - Y_{lik}(u) \frac{E_l \{dM_{l1k}(\beta_0, u) | \theta_{l01}, \xi_{li} = 0\}}{E_l \{Y_{l1k}(u) | \theta_{l01}\}} \right] \\ & + (\frac{\eta_{li1} + \eta_{li1} - \eta_{li2} \eta_{li2}}{\tilde{\gamma}_{l1k} + \tilde{\gamma}_{l2k} - \tilde{\gamma}_{l2k} \tilde{\gamma}_{l2k}} - 1) \Delta_{li1} \Delta_{li2} \int_0^t \frac{1}{\sum_{l=1}^L q_l E_l \{Y_{l1k}(t)\}} \\ & \times \left[ dM_{lik}(u) - Y_{lik}(u) \frac{E_l \{dM_{l1k}(\beta_0, u) | \theta_{l11}, \xi_{li} = 0\}}{E_l \{Y_{l1k}(u) | \theta_{l11}\}} \right] ], \end{aligned}$$

Combining all results, we get

$$\begin{aligned} & n^{1/2} \{\tilde{\Lambda}_{0k}(\tilde{\beta}, t) - \Lambda_{0k}(t)\} \\ & = n^{-1/2} \sum_{l=1}^L \sum_{i=1}^{n_l} \mu_{lik}(\beta_0, t) + n^{-1/2} \sum_{l=1}^L \sum_{i=1}^{n_l} (1 - \frac{\xi_{li}}{\tilde{\alpha}_l}) \nu_{lik}(\beta_0, t) + n^{-1/2} \sum_{l=1}^L \sum_{i=1}^{n_l} \nu_{lik}(\beta_0, t) + o_p(1), \end{aligned}$$

where

$$\mu_{lik}(\beta, t) = l_k(t)^T A^{-1} \sum_{m=1}^2 Q_{lim}(\beta) + \int_0^t \frac{1}{\sum_{l=1}^L q_l E_l \{Y_{l1k}(u)\}} dM_{lik}(u),$$

$$\begin{aligned}
w_{lik}(\beta, t) &= l_k(t)^T A^{-1} \sum_{m=1}^2 \prod_{j=1}^2 (1 - \Delta_{lij}) \\
&\times \int_0^\tau [B_{lim}(\beta, u) - \frac{Y_{lim}(u) E_l \{ \prod_{j=1}^2 (1 - \Delta_{lj}) B_{l1m}(\beta, u) \}}{E_l \{ \prod_{j=1}^2 (1 - \Delta_{lj}) Y_{l1m}(u) \}}] du + \prod_{j=1}^2 (1 - \Delta_{lij}) \\
&\times \int_0^t Y_{lik}(u) \{ \beta_0^T Z_{lik}(u) - \frac{E \{ \prod_{j=1}^2 (1 - \Delta_{lj}) Y_{l1k}(u) \beta_0^T Z_{l1k}(u) \}}{E \{ \prod_{j=1}^2 (1 - \Delta_{lj}) Y_{l1k}(u) \}} \cdot \frac{du}{\sum_{l=1}^L q_l E_l \{ Y_{l1k}(u) \}} \},
\end{aligned}$$

$$\nu_{lik}(\beta, t) = l_k(t)^T A^{-1} \sum_{m=1}^2 \nu_{lim}^{(1)}(\beta, t) + \nu_{lim}^{(2)}(\beta, t),$$

$$\nu_{lik,1}^{(1)}(\beta, t) = \Delta_{li1} (1 - \Delta_{li2}) (1 - \xi_{li}) \left( \frac{\eta_{li1}}{\tilde{\gamma}_{l1k}} - 1 \right) \nu_{lik,1}^{(1)}(\beta, t)$$

$$+ (1 - \Delta_{li1}) \Delta_{li2} (1 - \xi_{li}) \left( \frac{\eta_{li2}}{\tilde{\gamma}_{l2k}} - 1 \right) \nu_{lik,2}^{(1)}(\beta, t),$$

$$+ \Delta_{li1} \Delta_{li2} (1 - \xi_{li}) \left\{ \left( \frac{\eta_{li1} + \eta_{li2} - \eta_{li1} \eta_{li2}}{\tilde{\gamma}_{l1k} + \tilde{\gamma}_{l2k} - \tilde{\gamma}_{l1k} \tilde{\gamma}_{l2k}} - 1 \right) + \left( \frac{\eta_{li2}}{\tilde{\gamma}_{l4k}} - 1 \right) \right\} \nu_{lim,3}^{(1)}(\beta, t),$$

$$\nu_{lik,1}^{(1)}(\beta, t) = Q_{lik}(\beta, t) - \int_0^\tau Y_{lik}(t) \frac{E_l \{ dQ_{l1k}(\beta, t) | \theta_{l10}, \xi_{l1} = 1 \}}{E_l \{ Y_{l1k}(t) | \theta_{l10} \}},$$

$$\nu_{lik,2}^{(1)}(\beta, t) = Q_{lik}(\beta, t) - \int_0^\tau Y_{ik}(t) \frac{E_l \{ dQ_{l1k}(\beta, t) | \theta_{l01}, \xi_{l1} = 1 \}}{E_l \{ Y_{l1k}(t) | \theta_{l01} \}},$$

$$\nu_{lik,3}^{(1)}(\beta, t) = Q_{lik}(\beta, t) - \int_0^\tau Y_{lik}(t) \frac{E_l \{ dQ_{l1k}(\beta, t) | \theta_{l11}, \xi_{l1} = 1 \}}{E_l \{ Y_{l1k}(t) | \theta_{l11} \}},$$

$$\nu_{lik}^{(2)}(\beta, t) = (1 - \xi_{li}) \left\{ \Delta_{li1} (1 - \Delta_{li2}) \left( \frac{\eta_{li1}}{\tilde{\gamma}_{l1k}} - 1 \right) \nu_{lik,1}^{(2)}(\beta, t) + (1 - \Delta_{li1}) \Delta_{li2} \left( \frac{\eta_{li2}}{\tilde{\gamma}_{l2k}} - 1 \right) \nu_{lik,2}^{(2)}(\beta, t), \right.$$

$$\left. + \Delta_{li1} \Delta_{li2} \left\{ \left( \frac{\eta_{li1} + \eta_{li2} - \eta_{li1} \eta_{li2}}{\tilde{\gamma}_{l1k} + \tilde{\gamma}_{l2k} - \tilde{\gamma}_{l1k} \tilde{\gamma}_{l2k}} - 1 \right) + \left( \frac{\eta_{li2}}{\tilde{\gamma}_{l4k}} - 1 \right) \right\} \nu_{lik,3}^{(2)}(\beta, t) \right\},$$

$$\nu_{lik,1}^{(2)}(\beta, t) = \int_0^t \frac{1}{\sum_{l=1}^L q_l E_l \{ Y_{l1k}(u) \}} [dM_{lik}(\beta, u) - Y_{lik}(u) \frac{E_l \{ dM_{l1k}(\beta, u) | \theta_{l10}, \xi_{l1} = 0 \}}{E_l \{ Y_{l1k}(u) | \theta_{l10} \}}],$$

$$\nu_{lik,2}^{(2)}(\beta, t) = \int_0^t \frac{1}{\sum_{l=1}^L q_l E_l \{ Y_{l1k}(u) \}} [dM_{lik}(\beta, u) - Y_{lik}(u) \frac{E_l \{ dM_{l1k}(\beta, u) | \theta_{l01}, \xi_{l1} = 0 \}}{E_l \{ Y_{l1k}(u) | \theta_{l01} \}}],$$

$$\nu_{lik,3}^{(2)}(\beta, t) = \int_0^t \frac{1}{\sum_{l=1}^L q_l E_l \{ Y_{l1k}(u) \}} [dM_{lik}(\beta, u) - Y_{lik}(u) \frac{E_l \{ dM_{l1k}(\beta, u) | \theta_{l11}, \xi_{l1} = 0 \}}{E_l \{ Y_{l1k}(u) | \theta_{l11} \}}]$$

Let  $G^{(1)}(t) = \{G_1^{(1)}(t), G_2^{(1)}(t)\}$  where  $G_k^{(1)}(t) = n^{-1/2} \sum_{l=1}^L \sum_{i=1}^{n_l} \mu_{lik}(\beta, t)$ ,  $G^{(2)}(t) = \{G_1^{(2)}(t), G_2^{(2)}(t)\}$  where  $G_k^{(2)}(t) = n^{-1/2} \sum_{l=1}^L \sum_{i=1}^{n_l} (1 - \frac{\xi_{li}}{\alpha_l}) w_{lik}(\beta, t)$ , and  $G^{(3)}(t) = \{G_1^{(3)}(t), G_2^{(3)}(t)\}$  where  $G_k^{(3)}(t) = n^{-1/2} \sum_{l=1}^L \sum_{i=1}^{n_l} \nu_{lik}(\beta, t)$ . Then  $G^{(1)}(t)$  converges weakly to a zero-mean Gaussian process,  $\mathcal{G}^{(1)}(t) = \{G_1^{(1)}(t), G_2^{(1)}(t)\}$  in  $D[0, \tau]^k$  where the covariance function between  $\mathcal{G}_j^{(1)}(t)$  and  $\mathcal{G}_k^{(1)}(s)$  is  $E\{\mu_{1j}(\beta_0, t), \mu_{1k}(\beta, s)\}$  by theorem 2 of Yin and Cai[4].

It can be shown that  $G^{(2)}(t)$  converges weakly to a zero-mean Gaussian process  $\mathcal{G}^{(2)}(t) = \{G_1^{(2)}(t), G_2^{(2)}(t)\}$  where covariance function  $\mathcal{G}_j^{(2)}(t)$  and  $\mathcal{G}_k^{(2)}(s)$  is  $\frac{1-\alpha_l}{\alpha_l} E_l \{w_{l1j}(\beta_0, t), w_{l1k}(\beta_0, s)\}$

by Lemma 1.2, Cramer-Wold device and the marginal tightness of  $G_k^{(2)}(t)$  for each  $k$ .

Similarly,  $G^{(3)}(t)$  converges weakly to a zero-mean Gaussian process. By the conditional expectation arguments, the three terms  $(G^{(1)}(t), G^{(2)}(t), G^{(3)}(t))$  are mutually independent. Therefore,  $G(t) = G^{(1)}(t) + G^{(2)}(t) + G^{(3)}(t)$  converges to a zero-mean Gaussian process  $\mathcal{G}(t) = \mathcal{G}^{(1)}(t) + \mathcal{G}^{(2)}(t) + \mathcal{G}^{(3)}(t)$ .

## References

- [1] Lin DY. On fitting cox's proportional hazards models to survey data. *Biometrika* 2000; **87**:37–47.
- [2] Kang S, Cai J. Marginal hazard model for case-cohort studies with multiple disease outcomes. *Biometrika* 2009; **96**:887–901.
- [3] Fourtz RV. On the unique consistent solution to the likelihood equations. *J. Am. Statist. Assoc.* 1977; **72**:147–8.
- [4] Yin G, Cai J. Additive hazards model with multivariate failure time data. *Biometrika* 2004; **91**:801–818.
- [5] van der Vaart AW, Wellner JA. *Weak Convergence and Empirical Processes*. Springer: New York, 1996.
- [6] Hájek J. Limiting distributions in simple random sampling from a finite population. *Publ. Math. Inst. Hungar. Acad. Sci.* 1960; **5**:361–74.
